# Supplementary material for: Mesoporous silica-supported platinum nanocatalysts for colorimetric detection of glucose, cholesterol, and C-reactive protein
Source: Royal Society of Chemistry journal article supplement (doi:10.1039/d4dt01534g), 2024-01-01
Supplement: d4dt01534g1.pdf [file d4dt01534g1.pdf]

## Supplementary Information

### **Mesoporous silica-supported platinum nanocatalysts for detection of glucose, cholesterol, and C-reactive protein**

Taehyeong Kim,<sup>1,2</sup> and Dokyoon Kim<sup>1,2</sup>

<sup>1</sup> Department of Bionano Engineering, Hanyang University, Ansan 15588, Republic of Korea.

<sup>2</sup> Center for Bionano Intelligence Education and Research, Hanyang University, Ansan 15588, Republic of Korea.

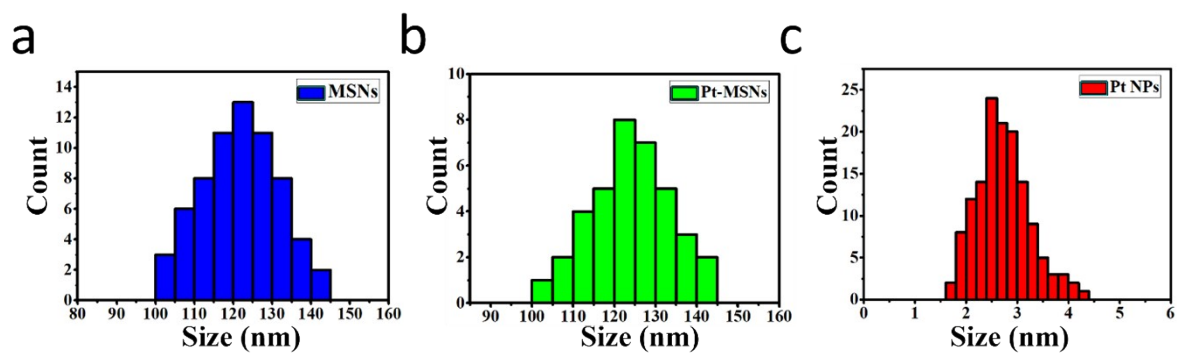

**Fig. S1** Size distributions of (a) MSNs, (b) Pt-MSNs, and (c) Pt NPs. Average sizes are  $121.9 \pm 10.1$ ,  $124.3 \pm 9.5$ , and  $2.8 \pm 0.5$  nm for MSNs, Pt-MSNs, and Pt NPs, respectively.

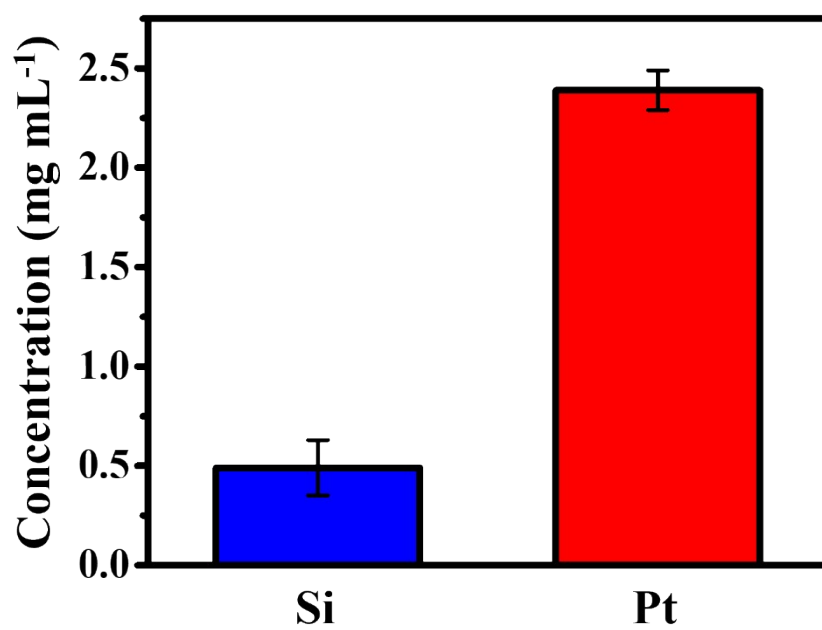

**Fig. S2** ICP-AES data of Pt-MSNs. [Si] = 0.49 mg mL<sup>-1</sup> and [Pt] = 2.39 mg mL<sup>-1</sup>.

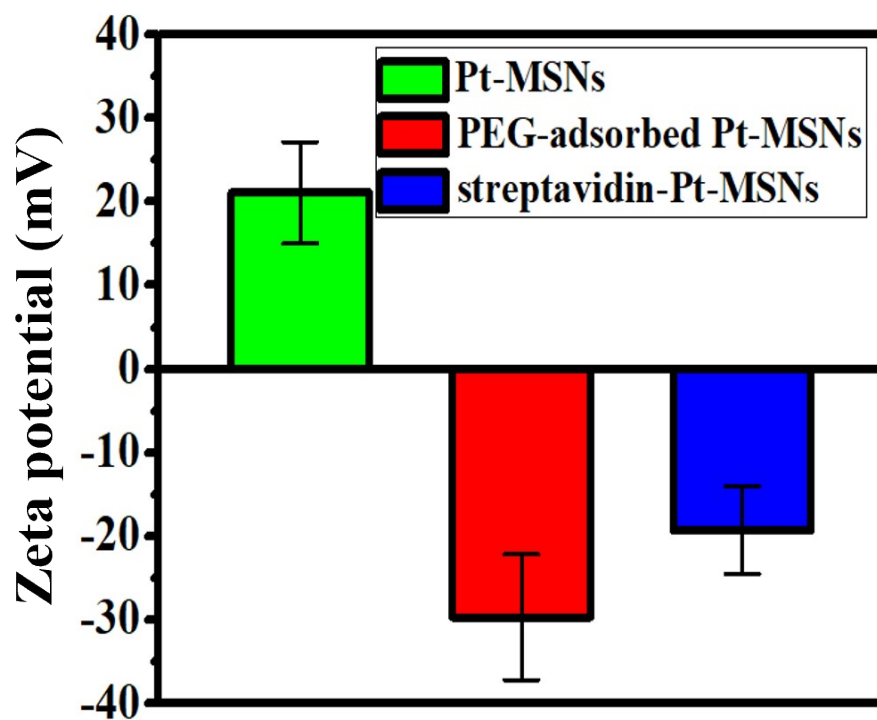

**Fig. S3** Zeta-potential values of Pt-MSNs, PEG-adsorbed Pt-MSNs, and streptavidin-Pt-MSNs.

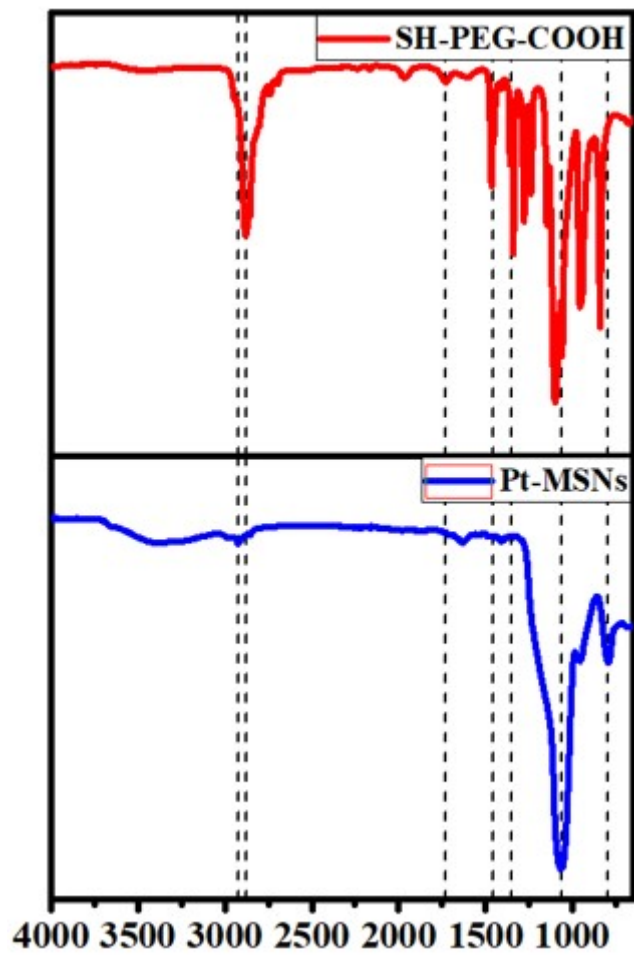

**Fig. S4** FT-IR spectra of SH-PEG-COOH and Pt-MSNs.

**Table S1** Comparison of the kinetic parameters of Pt-MSNs, HRP, and other Pt-based nanomaterials.  $K_M$ : Michaelis-Menten constant,  $V_{max}$ : maximum velocity, and  $K_{cat}$ : catalytic constant.

| <b>Catalyst</b>                         | <b>Substrate</b>              | <b><math>K_M</math> (mM)</b> | <b><math>V_{max} \times 10^{-8}</math><br/>(<math>M s^{-1}</math>)</b> | <b><math>K_{cat}</math> (<math>s^{-1}</math>)</b> | <b>Ref.</b> |
|-----------------------------------------|-------------------------------|------------------------------|------------------------------------------------------------------------|---------------------------------------------------|-------------|
| <b>Pt-MSN</b>                           | TMB                           | 0.635                        | 112                                                                    | $7.88 \times 10^4$                                | This study  |
|                                         | H <sub>2</sub> O <sub>2</sub> | 155                          | 63.1                                                                   | $4.44 \times 10^4$                                | This study  |
| <b>HRP</b>                              | TMB                           | 0.434                        | 10.0                                                                   | $4.00 \times 10^3$                                | 1           |
|                                         | H <sub>2</sub> O <sub>2</sub> | 3.70                         | 8.71                                                                   | $3.48 \times 10^3$                                |             |
| <b>ISPtNP</b>                           | TMB                           | 0.120                        | 126                                                                    | $2.27 \times 10^4$                                | 2           |
|                                         | H <sub>2</sub> O <sub>2</sub> | 769                          | 185                                                                    | $1.55 \times 10^4$                                |             |
| <b>Fe<sub>3</sub>O<sub>4</sub>@PtNP</b> | TMB                           | 0.147                        | 7.11                                                                   | 84.1                                              | 3           |
|                                         | H <sub>2</sub> O <sub>2</sub> | 703                          | 71.4                                                                   | 84.4                                              |             |
| <b>Pt hollow nanodendrites</b>          | TMB                           | 0.81                         | 12.0                                                                   | 0.017                                             | 4           |
|                                         | H <sub>2</sub> O <sub>2</sub> | 6.90                         | 9.90                                                                   | 0.014                                             |             |
| <b>PVP-PtNC</b>                         | TMB                           | 0.022                        | 105                                                                    | $6.29 \times 10^4$                                | 5           |
|                                         | H <sub>2</sub> O <sub>2</sub> | 3.92                         | 36.1                                                                   | $2.16 \times 10^4$                                |             |

**Table S2** Comparison of the linear ranges and LOD values of Pt-MSN- and previous reported Pt-based glucose assays.

| <b>Probe</b>                                                        | <b>Method</b> | <b>Marker</b> | <b>Linear range (mM)</b> | <b>Limit of detection (LOD) (<math>\mu</math>M)</b> | <b>Ref.</b> |
|---------------------------------------------------------------------|---------------|---------------|--------------------------|-----------------------------------------------------|-------------|
| <b>Pt-MSN</b>                                                       | Colorimetric  | Glucose       | 0.08 - 2.5               | 20                                                  | This study  |
| <b>PtCuCo nanostructure</b>                                         | Colorimetric  | Glucose       | 0.20 - 1.5               | 80                                                  | 6           |
| <b>Au-PtNCs-GMP</b>                                                 | Colorimetric  | Glucose       | 0.05 – 0.40              | 11                                                  | 7           |
| <b>CCNP</b>                                                         | Colorimetric  | Glucose       | 0.10 - 10                | 2896                                                | 8           |
| <b>Platinum electrode</b>                                           | Amperometric  | Glucose       | 1.0 – 10                 | 800                                                 | 9           |
| <b>Gox-PoPD/PtNPs/PVF<sup>+</sup>ClO<sub>4</sub><sup>-</sup>/Pt</b> | Amperometric  | Glucose       | 0.06 - 9.6               | 18                                                  | 10          |
| <b>Pt/MWNT</b>                                                      | Amperometric  | Glucose       | 1.0-23                   | 50                                                  | 11          |

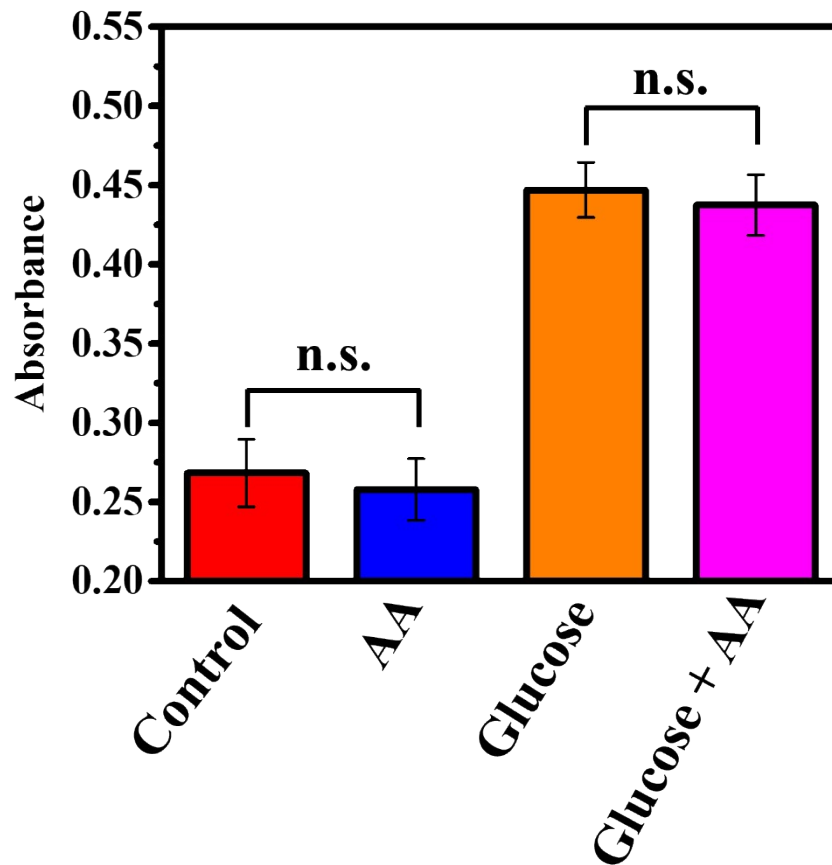

**Fig. S5** Specificity test results of glucose in the presence of ascorbic acid (AA) at normal blood concentration ( $n = 7$ ).  $[\text{glucose}] = 2 \text{ mM}$ ,  $[\text{AA}] = 45 \text{ }\mu\text{M}$ . Data were analyzed by Mann-Whitney U test. n.s.  $> 0.05$  compared with the control.



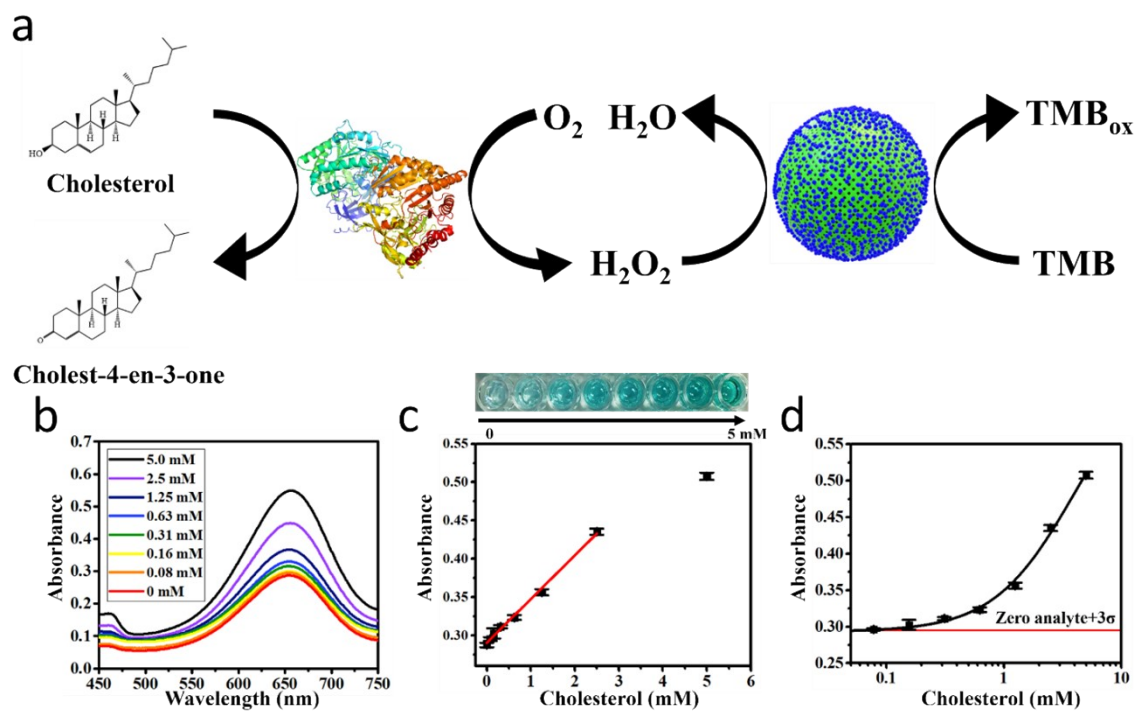

**Fig. S6** Detection of cholesterol using Pt-MSNs. (a) Schematic diagram showing the two-step cascade reaction. (b) Cholesterol concentration-dependent absorbance change of the sample solution. (c) Linear response range of the assay ( $n = 3$ ). (d) Semi-log calibration plot showing the detection limit.

**Table S3** Comparison of LOD values and linear ranges of Pt-MSN- and previously reported Pt-based CRP immunoassays.

| <b>Probe</b>                | <b>Method</b> | <b>marker</b> | <b>Linear range (pM)</b> | <b>Limit of detection (LOD) (pM)</b> | <b>Ref.</b> |
|-----------------------------|---------------|---------------|--------------------------|--------------------------------------|-------------|
| <b>Pt-MSN</b>               | Colorimetric  | CRP           | 1.4 – 87.0               | 3.9                                  | This study  |
| <b>MPN</b>                  | Colorimetric  | CRP           | 10.4 – 339.1             | 5.7                                  | 12          |
| <b>Pt-MDMC</b>              | Colorimetric  | CRP           | 13 – 2174                | 14.6                                 | 13          |
| <b>AuPtRh NBC</b>           | Amperometric  | CRP           | 0.4 – 4.3 $\mu$ M        | 0.3                                  | 14          |
| <b>Pt/Ru/C nanoparticle</b> | Amperometric  | CRP           | 8.7 – 869.6              | 4.3                                  | 15          |

## References

1. Gao L, Zhuang J, Nie L, Zhang J, Zhang Y, Gu N, Wang T, Feng J, Yang D and Yan X, Intrinsic peroxidase-like activity of ferromagnetic nanoparticles, *Nat. Nanotechnol.* 2007, **2**, 577-583.
2. Gao Z, Xu M, Hou L, Chen G and Tang D, Irregular-shaped platinum nanoparticles as peroxidase mimics for highly efficient colorimetric immunoassay, *Anal. Chim. Acta* 2013, **776**, 79-86.
3. Ma M, Xie J, Zhang Y, Chen Z and Gu N, Fe<sub>3</sub>O<sub>4</sub>@ Pt nanoparticles with enhanced peroxidase-like catalytic activity, *Mater. Lett.*, 2013, **105**, 36-39.
4. Ge C, Wu R, Chong Y, Fang G, Jiang X, Pan Y, Chen C and Yin JJ, Synthesis of Pt hollow nanodendrites with enhanced peroxidase-like activity against bacterial infections: implication for wound healing, *Adv. Funct. Mater.*, 2018, **28**, 1801484.
5. Ma X, Feng T, Zhang P, Zhang H, Hu X, Yang Y, Wang Z, Zhang H, Peng D, Li X and Xu J, Downregulation of peroxidase activity of platinum cube enables minute-time scale colorimetric signaling of hypoxanthine for fish freshness monitoring, *Foods*, 2023, **12**, 291.
6. He W, Cai J, Zhang H, Zhang L, Zhang X, Li J and Yin JJ, Formation of PtCuCo trimetallic nanostructures with enhanced catalytic and enzyme-like activities for biodetection, *ACS Appl. Nano Mater.*, 2017, **1**, 222-231.
7. Sun H, Zhang J, Wang M and Su X, Ratiometric fluorometric and colorimetric dual-mode sensing of glucose based on gold-platinum bimetallic nanoclusters, *Microchem J.*, 2022, **179**, 107574.
8. Lee G, Kim C, Kim D, Hong C, Kim T, Lee M and Lee K, Multibranched Au–Ag–Pt nanoparticle as a nanozyme for the colorimetric assay of hydrogen peroxide and glucose, *ACS Omega*, 2022, **7**, 40973-40982.
9. Weremfo A, Fong STC, Khan A, Hibbert DB and Zhao C, Electrochemically roughened nanoporous platinum electrodes for non-enzymatic glucose sensors, *Electrochim. Acta*, 2017, **231**, 20-26.
10. Turkmen E, Bas SZ, Gulce H and Yildiz S, Glucose biosensor based on immobilization of glucose oxidase in electropolymerized poly(o-phenylenediamine)

film on platinum nanoparticles-polyvinylferrocenium modified electrode, *Electrochim. Acta*, 2014, **123**, 93-102.

11. Li LH and Zhang WD, Preparation of carbon nanotubes supported platinum nanoparticles by an organic colloidal process for nonenzymatic glucose sensing, *Microchim. Acta*, 2008, **163**, 305-311.
12. Son SE, Gupta PK, Hur W, Lee HB, Park Y, Park J, Kim SN and Seong GH, Mesoporous platinum nanoparticles as a peroxidase mimic for the highly sensitive determination of C-reactive protein, *Anal. Bioanal. Chem.*, 2022, **414**, 7191-7201.
13. Ivanova P, Drozd M, Michrowski K, Karoń S, Marta MP and Pietrzak M, Au-X (X=Pt/Ru)-decorated magnetic nanocubes as bifunctional nanozyme labels in colorimetric, magnetically-enhanced, one-step sandwich CRP immunoassay, *Biosens. Bioelectron.*, 2023, **237**, 115511.
14. Feng YG, He JW, Jiang LY, Chen DN, Wang AJ and Feng JJ, Novel sandwich-typed electrochemical immunosensing of C-reactive protein using multiply twinned AuPtRh nanobead chains and nitrogen-rich porous carbon nanospheres decorated with Au nanoparticles, *Sens. Actuator B-Chem.*, 2022, **358**, 131518.
15. Liu TZ, Hu R, Liu Y, Zhang KL, Bai RY and Yang YH, Amperometric immunosensor based on covalent organic frameworks and Pt/Ru/C nanoparticles for the quantification of C-reactive protein, *Microchim. Acta*, 2020, **187**, 1-10.
